# Supplementary material
Source: PubMed Central journal article supplement (PMC8791325)

**Supplementary material to Correa et. al. “Electrolyte Changes in Contemporary Hemodialysis: A Secondary Analysis of the Monitoring in Dialysis (MiD) Study”**

**Index of contents**

**Supplementary Table 1.** Characteristics of the participants at baseline according to country of origin.

**Supplementary Table 2.** Characteristics of the dialysis prescription at baseline, according to country of origin.

**Supplementary Table 3.** Changes in pre-HD to post-HD serum electrolytes according to country of origin.

**Supplementary Table 4.** Fixed effect estimates from models predicting pre- to immediately post-HD electrolyte change from dialysate concentration and pre-dialysis electrolyte concentration in the MiD Study.

**Supplementary Table 5.** Predicted change in serum sodium concentration from pre-HD to post-HD measurement.

**Supplementary Table 6.** Predicted change in serum potassium concentration from pre-HD to post-HD measurement.

**Supplementary Table 7.** Predicted change in serum bicarbonate concentration from pre-HD to post-HD measurement.

**Supplementary Table 8.** Predicted change in serum calcium concentration from pre-HD to post-HD measurement.

**Supplementary Figure 1.** Predicted change in serum sodium (A, India; B, US), serum potassium (C, India; D, US), serum bicarbonate (E, India; F, US), and serum calcium (G, India; H, US), according to baseline serum electrolyte and dialysate prescription. Each graph is based on a model that adjusted for the pre-HD concentration of the corresponding electrolyte of interest.

**Supplementary Table 1.** Characteristics of the participants at baseline according to country of origin

| Baseline Characteristics       | All subjects (n=66) | United States (n=43) | India (n=23)   | P-value |
|--------------------------------|---------------------|----------------------|----------------|---------|
| Age, years                     | 56 ± 12             | 56 ± 12              | 57 ± 13        | 0.66    |
| Male, n (%)                    | 46 (70)             | 27 (63)              | 19 (83)        | 0.16    |
| Race, n (%)                    |                     |                      |                | <0.001  |
| Asian                          | 23 (35)             | 0 (0)                | 23 (100)       |         |
| Black                          | 35 (53)             | 35 (82)              | 0 (0)          |         |
| White                          | 7 (11)              | 7 (16)               | 0 (0)          |         |
| Other                          | 1 (1)               | 1 (2)                | 0 (0)          |         |
| ESRD vintage, years            | 2.4 [1.2, 5.3]      | 3.5 [1.2, 5.7]       | 2.2 [1.1, 3.0] | <0.001  |
| Vascular access, n (%)         |                     |                      |                | 0.001   |
| AV fistula                     | 46 (71)             | 25 (59)              | 21 (91)        |         |
| AV graft                       | 16 (25)             | 15 (36)              | 1 (4)          |         |
| Catheter                       | 3 (5)               | 2 (5)                | 1 (4)          |         |
| Comorbid conditions, n (%)     |                     |                      |                |         |
| Diabetes mellitus              | 28 (43)             | 15 (35)              | 13 (56)        | 0.01    |
| Hyperlipidemia                 | 40 (61)             | 32 (74)              | 8 (35)         | 0.003   |
| Hypertension                   | 56 (85)             | 42 (98)              | 14 (61)        | <0.001  |
| Ischemic heart disease         | 32 (48)             | 22 (51)              | 10 (44)        | 0.61    |
| Congestive heart failure       | 17 (26)             | 17 (40)              | 0 (0)          | <0.001  |
| Arrhythmia                     | 21 (32)             | 21 (49)              | 0 (0)          | <0.001  |
| Atrial fibrillation            | 7 (11)              | 7 (16)               | 0 (0)          | 0.09    |
| Systolic blood pressure, mmHg  | 141 ± 23            | 140 ± 26             | 143 ± 18       | 0.57    |
| Diastolic blood pressure, mmHg | 77 ± 13             | 76 ± 15              | 79 ± 7         | 0.18    |
| Medication use, n(%)           |                     |                      |                |         |
| Aspirin                        | 30 (45)             | 21 (49)              | 9 (39)         | 0.60    |
| Statin                         | 32 (48)             | 20 (47)              | 12 (52)        | 0.80    |
| ACEI or ARB                    | 22 (33)             | 20 (47)              | 2 (9)          | <0.01   |
| Beta-blockers                  | 36 (55)             | 25 (58)              | 11 (48)        | 0.45    |
| Pre-dialysis Laboratory values |                     |                      |                |         |
| Blood urea nitrogen, mg/dL     | 60 ± 18             | 59 ± 16              | 62 ± 22        | 0.47    |
| Creatinine, mg/dL              | 10.0 ± 3.4          | 10.9 ± 3.5           | 8.3 ± 2.4      | 0.01    |
| Sodium, mEq/L                  | 137 ± 4             | 138 ± 4              | 134 ± 4        | <0.001  |
| Potassium, mEq/L               | 5.0 ± 1.0           | 4.8 ± 0.7            | 5.4 ± 1.3      | 0.07    |
| Calcium, mg/dL                 | 8.7 ± 0.8           | 8.8 ± 0.8            | 8.4 ± 0.8      | 0.08    |
| Bicarbonate, mEq/L             | 22 ± 4              | 23.8 ± 2.9           | 18.8 ± 2.9     | <0.001  |
| Magnesium, mg/dL               | 2.4 ± 0.5           | 2.2 ± 0.3            | 2.8 ± 0.6      | 0.001   |
| Phosphorus, mg/dL              | 5.5 ± 2.0           | 5.7 ± 2.1            | 5.0 ± 1.9      | 0.19    |
| Hemoglobin, g/dL               | 11 ± 1              | 10.8 ± 1.0           | 10 ± 2         | 0.12    |
| Serum albumin, g/dL            | 3.9 ± 0.3           | 4.0 ± 0.3            | 3.8 ± 0.4      | 0.01    |

Continuous variables are presented as means ± standard deviation or median [25<sup>th</sup>, 75<sup>th</sup> percentiles]. Abbreviations: ESRD, end-stage renal disease; AV, arteriovenous; ACEI, angiotensin converting enzyme inhibitor; ARB, angiotensin receptor blocker.

Percentages may not add to 100 due to rounding.

**Supplementary Table 2.** Characteristics of the dialysis prescription at baseline, according to country of origin

| Baseline Characteristics                  | All subjects (n=66) | United States (n=43) | India (n=23)    | P-value |
|-------------------------------------------|---------------------|----------------------|-----------------|---------|
| Duration of hemodialysis, hours           | 4.0 [3.0, 6.0]      | 3.8 [3.0, 5.0]       | 4.0 [3.0, 6.0]  | 0.20    |
| spKt/V                                    | 1.5 ± 0.4           | 1.5 ± 0.3            | 1.4 ± 0.6       | 0.44    |
| Pre-dialysis weight, kg                   | 86.7 ± 28.8         | 97.6 ± 28.7          | 66.5 ± 14.9     | <0.001  |
| Kg over dry weight target before dialysis | 4.2 [-0.4, 12.0]    | 4.5 [0.7, 12.0]      | 4.1 [-0.4, 6.3] | 0.07    |
| UFR, ml/kg/h                              | 10 ± 4              | 10 ± 4               | 10 ± 4          | 0.74    |
| Dialysate Flow, mL/min                    | 600 [500, 800]      | 664 [600, 800]       | 500 [485, 500]  | <0.001  |
| Blood Flow, mL/min                        | 390 [324, 461]      | 437 [391, 491]       | 302 [262, 332]  | <0.001  |
| High-flux dialyzer, n (%)                 | 42 (64)             | 40 (93)              | 2 (8.7)         | <0.001  |
| Membrane reuse, n (%)                     | 18 (27)             | 10 (23)              | 8 (35)          | 0.39    |
| Cellulose membrane, n (%)                 | 5 (8)               | 0 (0)                | 5 (22)          | <0.01   |
| Dialysate temperature, n (%)              |                     |                      |                 | <0.01   |
| 35.5 Celsius                              | 1 (2)               | 1 (2)                | 0 (0)           |         |
| 36.0 Celsius                              | 3 (5)               | 3 (7)                | 0 (0)           |         |
| 36.5 Celsius                              | 5 (8)               | 0 (0)                | 5 (22)          |         |
| 37.0 Celsius                              | 57 (86)             | 39 (91)              | 18 (78)         |         |
| Dialysate potassium, n (%)                |                     |                      |                 | <0.01   |
| 1.0 mEq/L                                 | 1 (2)               | 1 (2)                | 0 (0)           |         |
| 2.0 mEq/L                                 | 53 (80)             | 30 (70)              | 13 (100)        |         |
| 3.0 mEq/L                                 | 11 (17)             | 11 (26)              | 0 (0)           |         |
| 4.0 mEq/L                                 | 1 (2)               | 1 (2)                | 0 (0)           |         |
| Dialysate calcium, n (%)                  |                     |                      |                 | <0.001  |
| 1.5 and 1.6 mEq/L                         | 13 (20)             | 0 (0)                | 13 (56)         |         |
| 2.0 and 2.5 mEq/L                         | 39 (59)             | 39 (91)              | 0 (0)           |         |
| 3.0 and 3.5 mEq/L                         | 14 (21)             | 4 (9)                | 10 (44)         |         |
| Dialysate sodium, n (%)                   |                     |                      |                 | 0.45    |
| 135 mEq/L                                 | 6 (10)              | 3 (7)                | 3 (17)          |         |
| 138 mEq/L                                 | 6 (10)              | 4 (9)                | 2 (11)          |         |
| 140 mEq/L                                 | 49 (80)             | 36 (84)              | 13 (72)         |         |
| Dialysate Bicarbonate, n (%)              |                     |                      |                 | <0.001  |
| 24 - 32 mEq/L                             | 16 (24)             | 6 (14)               | 10 (43)         |         |
| 33 - 36 mEq/L                             | 34 (52)             | 21 (49)              | 13 (57)         |         |
| 37 - 40 mEq/L                             | 16 (24)             | 16 (37)              | 0 (0)           |         |

Continuous variables are presented as means ± standard deviation or median [25<sup>th</sup>, 75<sup>th</sup> percentiles]. Abbreviations: spKt/V, single-pool Kt/V; UFR, ultrafiltration rate. Percentages may not add to 100 due to rounding.

**Supplementary Table 3.** Changes in pre-HD to post-HD serum electrolytes according to country of origin.

|                                              | <i>Change in serum electrolyte (post-HD minus pre-HD) in mEq/L or mg/dL*<br/>Mean (SE)</i> |              |             |              |             |              |
|----------------------------------------------|--------------------------------------------------------------------------------------------|--------------|-------------|--------------|-------------|--------------|
|                                              | Unadjusted                                                                                 |              | Model 1     |              | Model 2     |              |
| <b>Dialysate Sodium<br/>n/N (%)</b>          | <b>US</b>                                                                                  | <b>India</b> | <b>US</b>   | <b>India</b> | <b>US</b>   | <b>India</b> |
| <b>135 (mEq/L)</b><br>191/1511 (13%)         | -1.4 (0.6)                                                                                 | 3.7 (1.6)    | -2.2 (0.4)  | 3.6 (1.5)    | -2.2 (0.4)  | 3.7 (1.5)    |
| <b>138 (mEq/L)</b><br>146/1511 (10%)         | -0.2 (1.3)                                                                                 | -1.5 (1.9)   | -0.5 (0.6)  | 0.2 (1.8)    | -0.5 (0.6)  | 0.2 (1.8)    |
| <b>140 (mEq/L)</b><br>1174/1511 (78%)        | 0.1 (0.4)                                                                                  | 0.7 (0.8)    | 0.3 (0.2)   | 0.3 (0.7)    | 0.3 (0.2)   | 0.1 (0.7)    |
| <b>P-value</b>                               | 0.01                                                                                       | 0.09         | <0.001      | 0.12         | <0.001      | 0.10         |
| <b>Dialysate Potassium<br/>n/N (%)</b>       |                                                                                            |              |             |              |             |              |
| <b>1 and 2 (mEq/L)</b><br>1336/1630 (82%)    | -1.3 (0.1)                                                                                 | -1.3 (0.1)   | -1.3 (0.04) | -1.3 (0.1)   | -1.3 (0.04) | -1.3 (0.1)   |
| <b>3 and 4 (mEq/L)</b><br>294/1630 (18%)     | -0.8 (0.1)                                                                                 | -            | -0.9 (0.1)  | -            | -0.9 (0.1)  | -            |
| <b>P-value</b>                               | <0.001                                                                                     | NA           | <0.001      | NA           | <0.001      | NA           |
| <b>Dialysate Bicarbonate<br/>n/N (%)</b>     |                                                                                            |              |             |              |             |              |
| <b>24 to 32 (mEq/L)</b><br>351/1610 (22%)    | 2.7 (0.7)                                                                                  | 6 (0.4)      | 2.1 (0.6)   | 5.9 (0.5)    | 2.0 (0.6)   | 5.8 (0.6)    |
| <b>33 to 36 (mEq/L)</b><br>803/1610 (50%)    | 4.2 (0.4)                                                                                  | 5.5 (0.4)    | 3.6 (0.4)   | 5.4 (0.5)    | 3.6 (0.4)   | 5.5 (0.5)    |
| <b>37 to 40 (mEq/L)</b><br>456/1610 (28%)    | 5.0 (0.4)                                                                                  | -            | 5.9 (0.4)   | -            | 5.9 (0.4)   | -            |
| <b>P-value</b>                               | 0.01                                                                                       | 0.31         | <0.001      | 0.49         | <0.001      | 0.67         |
| <b>Dialysate Calcium<br/>n/N (%)</b>         |                                                                                            |              |             |              |             |              |
| <b>1.5 and 1.6 (mEq/L)</b><br>359/1647 (22%) | -                                                                                          | 1.2 (0.3)    | -           | 1.1 (0.3)    | -           | 1.1 (0.3)    |
| <b>2 and 2.5 (mEq/L)</b><br>926/1647 (22%)   | 0.3 (0.1)                                                                                  | -            | 0.3 (0.1)   | -            | 0.3 (0.1)   | -            |
| <b>3 and 3.5 (mEq/L)</b><br>362/1647 (22%)   | 1.1 (0.1)                                                                                  | 1.3 (0.3)    | 1.4 (0.1)   | 1.4 (0.3)    | 1.4 (0.1)   | 1.4 (0.3)    |
| <b>P-value</b>                               | <0.001                                                                                     | 0.86         | <0.001      | 0.56         | <0.001      | 0.56         |

Model 1 adjusted for the pre-dialysis serum concentration; Model 2 adjusted for the pre-dialysis serum concentration and dialysis session length.

P-values for global difference in change of serum electrolyte concentration across categories of dialysate prescription.

\* Changes in serum sodium, potassium and bicarbonate are presented in mEq/L; changes in serum calcium are presented in mg/dL.

The total number of sessions with laboratory data may vary due to missing collections or data recording. Percentages may not add to 100 due to rounding

**Supplementary Table 4.** Fixed effect estimates from models predicting pre- to immediately post-HD electrolyte change from dialysate concentration and pre-dialysis electrolyte concentration in the MiD Study

| General formula to estimate electrolyte change                                                                                     |           |                  |           |                             |           |                               |           |
|------------------------------------------------------------------------------------------------------------------------------------|-----------|------------------|-----------|-----------------------------|-----------|-------------------------------|-----------|
| Electrolyte Change = Intercept + Dialysate Concentration*Value + Pre-HD Electrolyte Concentration*Value + Random Coefficient*Value |           |                  |           |                             |           |                               |           |
| Estimates for fixed effect models                                                                                                  |           |                  |           |                             |           |                               |           |
| Sodium change                                                                                                                      |           | Potassium change |           | Bicarbonate change          |           | Calcium change                |           |
|                                                                                                                                    | Estimate  |                  | Estimate  |                             | Estimate  |                               | Estimate  |
| Intercept                                                                                                                          | 98.4934   | Intercept        | -2.1318   | Intercept                   | 18.1823   | Intercept                     | -0.9714   |
| Dialysate Na 135                                                                                                                   | -2.0521   | Dialysate K 1    | -0.9748   | Dialysate Bicarbonate 24-32 | -2.9452   | Dialysate Calcium 1.5 and 1.6 | -0.461    |
| Dialysate Na 138                                                                                                                   | -1.0502   | Dialysate K 2    | -0.6068   | Dialysate Bicarbonate 33-36 | -2.1587   | Dialysate Calcium 2 and 2.5   | -0.9256   |
| Dialysate Na 140                                                                                                                   | Reference | Dialysate K 3    | -0.2718   | Dialysate Bicarbonate 37-40 | Reference | Dialysate Calcium 3.0 and 3.5 | Reference |
| Pre-HD Na                                                                                                                          | -0.7139   | Dialysate K 4    | Reference | Pre-HD Bicarbonate          | -0.522    | Pre-HD Ca 7.0-7.5             | 3.1478    |
|                                                                                                                                    |           | Pre-HD K 3.0-3.5 | 2.5824    |                             |           | Pre-HD Ca 7.6-8.0             | 2.781     |
|                                                                                                                                    |           | Pre-HD K 3.6-4.0 | 2.158     |                             |           | Pre-HD Ca 8.1-8.5             | 2.5544    |
|                                                                                                                                    |           | Pre-HD K 4.1-4.5 | 1.8006    |                             |           | Pre-HD Ca 8.6-9.0             | 2.232     |
|                                                                                                                                    |           | Pre-HD K 4.6-5.0 | 1.4941    |                             |           | Pre-HD Ca 9.1-9.5             | 1.9723    |
|                                                                                                                                    |           | Pre-HD K 5.1-5.5 | 1.1744    |                             |           | Pre-HD Ca 9.6-10.0            | 1.6949    |
|                                                                                                                                    |           | Pre-HD K 5.6-6.0 | 0.8316    |                             |           | Pre-HD Ca 10.1-10.5           | 1.3898    |
|                                                                                                                                    |           | Pre-HD K 6.1-6.5 | 0.4361    |                             |           | Pre-HD Ca 10.6-11.0           | 1.3668    |
|                                                                                                                                    |           | Pre-HD K 6.6-7.0 | Reference |                             |           | Pre-HD Ca 11.1-11.5           | 0.6853    |
|                                                                                                                                    |           |                  |           |                             |           | Pre-HD Ca 11.6-12.0           | Reference |

**Supplementary Table 5.** Predicted change in serum sodium concentration from pre-HD to post-HD measurement.

| Pre-HD sodium concentration (mEq/L) | Dialysate sodium concentration (mEq/L) | Expected Change Pre-Post (mEq/L) | Dialysate sodium concentration (mEq/L) | Expected Change Pre-Post (mEq/L) | Dialysate sodium concentration (mEq/L) | Expected Change Pre-Post (mEq/L) |
|-------------------------------------|----------------------------------------|----------------------------------|----------------------------------------|----------------------------------|----------------------------------------|----------------------------------|
| 130                                 | 135                                    | 3.6                              | 138                                    | 4.6                              | 140                                    | 5.7                              |
| 131                                 | 135                                    | 2.9                              | 138                                    | 3.9                              | 140                                    | 5                                |
| 132                                 | 135                                    | 2.2                              | 138                                    | 3.2                              | 140                                    | 4.3                              |
| 133                                 | 135                                    | 1.5                              | 138                                    | 2.5                              | 140                                    | 3.5                              |
| 134                                 | 135                                    | 0.8                              | 138                                    | 1.8                              | 140                                    | 2.8                              |
| 135                                 | 135                                    | 0.1                              | 138                                    | 1.1                              | 140                                    | 2.1                              |
| 136                                 | 135                                    | -0.6                             | 138                                    | 0.4                              | 140                                    | 1.4                              |
| 137                                 | 135                                    | -1.4                             | 138                                    | -0.4                             | 140                                    | 0.7                              |
| 138                                 | 135                                    | -2.1                             | 138                                    | -1.1                             | 140                                    | 0                                |
| 139                                 | 135                                    | -2.8                             | 138                                    | -1.8                             | 140                                    | -0.7                             |
| 140                                 | 135                                    | -3.5                             | 138                                    | -2.5                             | 140                                    | -1.4                             |
| 141                                 | 135                                    | -4.2                             | 138                                    | -3.2                             | 140                                    | -2.2                             |
| 142                                 | 135                                    | -4.9                             | 138                                    | -3.9                             | 140                                    | -2.9                             |
| 143                                 | 135                                    | -5.6                             | 138                                    | -4.6                             | 140                                    | -3.6                             |
| 144                                 | 135                                    | -6.4                             | 138                                    | -5.4                             | 140                                    | -4.3                             |
| 145                                 | 135                                    | -7.1                             | 138                                    | -6.1                             | 140                                    | -5                               |

Abbreviations: HD, hemodialysis.

Predictive model for post-dialysis serum sodium concentration accounts for pre-dialysis serum sodium concentration and dialysate sodium prescription.

**Supplementary Table 6.** Predicted change in serum potassium concentration from pre-HD to post-HD measurement.

| Pre-HD potassium concentration (mEq/L) | Dialysate potassium concentration (mEq/L) | Expected Change Pre-Post (mEq/L) | Dialysate potassium concentration (mEq/L) | Expected Change Pre-Post (mEq/L) | Dialysate potassium concentration (mEq/L) | Expected Change Pre-Post (mEq/L) | Dialysate potassium concentration (mEq/L) | Expected Change Pre-Post (mEq/L) |
|----------------------------------------|-------------------------------------------|----------------------------------|-------------------------------------------|----------------------------------|-------------------------------------------|----------------------------------|-------------------------------------------|----------------------------------|
| 3.0-3.5                                | 1                                         | -0.5                             | 2                                         | -0.2                             | 3                                         | 0.2                              | 4                                         | 0.5                              |
| 3.6-4.0                                | 1                                         | -0.9                             | 2                                         | -0.6                             | 3                                         | -0.2                             | 4                                         | 0                                |
| 4.1-4.5                                | 1                                         | -1.3                             | 2                                         | -0.9                             | 3                                         | -0.6                             | 4                                         | -0.3                             |
| 4.6-5.0                                | 1                                         | -1.6                             | 2                                         | -1.2                             | 3                                         | -0.9                             | 4                                         | -0.6                             |
| 5.1-5.5                                | 1                                         | -1.9                             | 2                                         | -1.6                             | 3                                         | -1.2                             | 4                                         | -1                               |
| 5.6-6.0                                | 1                                         | -2.3                             | 2                                         | -1.9                             | 3                                         | -1.6                             | 4                                         | -1.3                             |
| 6.1-6.5                                | 1                                         | -2.7                             | 2                                         | -2.3                             | 3                                         | -2                               | 4                                         | -1.7                             |
| 6.6-7.0                                | 1                                         | -3.1                             | 2                                         | -2.7                             | 3                                         | -2.4                             | 4                                         | -2.1                             |

Abbreviations: HD, hemodialysis.

Predictive model for post-dialysis serum potassium concentration accounts for pre-dialysis serum potassium concentration and dialysate potassium prescription.

**Supplementary Table 7.** Predicted change in serum bicarbonate concentration from pre-HD to post-HD measurement.

| Pre-HD bicarbonate concentration (mEq/L) | Dialysate bicarbonate concentration (mEq/L) | Expected Change Pre-Post (mEq/L) | Dialysate bicarbonate concentration (mEq/L) | Expected Change Pre-Post (mEq/L) | Dialysate bicarbonate concentration (mEq/L) | Expected Change Pre-Post (mEq/L) |
|------------------------------------------|---------------------------------------------|----------------------------------|---------------------------------------------|----------------------------------|---------------------------------------------|----------------------------------|
| 15                                       | 24 to 32                                    | 7.4                              | 33 to 36                                    | 8.2                              | 37 to 40                                    | 10.4                             |
| 16                                       | 24 to 32                                    | 6.9                              | 33 to 36                                    | 7.7                              | 37 to 40                                    | 9.8                              |
| 17                                       | 24 to 32                                    | 6.4                              | 33 to 36                                    | 7.1                              | 37 to 40                                    | 9.3                              |
| 18                                       | 24 to 32                                    | 5.8                              | 33 to 36                                    | 6.6                              | 37 to 40                                    | 8.8                              |
| 19                                       | 24 to 32                                    | 5.3                              | 33 to 36                                    | 6.1                              | 37 to 40                                    | 8.3                              |
| 20                                       | 24 to 32                                    | 4.8                              | 33 to 36                                    | 5.6                              | 37 to 40                                    | 7.7                              |
| 21                                       | 24 to 32                                    | 4.3                              | 33 to 36                                    | 5.1                              | 37 to 40                                    | 7.2                              |
| 22                                       | 24 to 32                                    | 3.8                              | 33 to 36                                    | 4.5                              | 37 to 40                                    | 6.7                              |
| 23                                       | 24 to 32                                    | 3.2                              | 33 to 36                                    | 4                                | 37 to 40                                    | 6.2                              |
| 24                                       | 24 to 32                                    | 2.7                              | 33 to 36                                    | 3.5                              | 37 to 40                                    | 5.7                              |
| 25                                       | 24 to 32                                    | 2.2                              | 33 to 36                                    | 3                                | 37 to 40                                    | 5.1                              |
| 26                                       | 24 to 32                                    | 1.7                              | 33 to 36                                    | 2.5                              | 37 to 40                                    | 4.6                              |
| 27                                       | 24 to 32                                    | 1.1                              | 33 to 36                                    | 1.9                              | 37 to 40                                    | 4.1                              |
| 28                                       | 24 to 32                                    | 0.6                              | 33 to 36                                    | 1.4                              | 37 to 40                                    | 3.6                              |
| 29                                       | 24 to 32                                    | 0.1                              | 33 to 36                                    | 0.9                              | 37 to 40                                    | 3                                |
| 30                                       | 24 to 32                                    | -0.4                             | 33 to 36                                    | 0.4                              | 37 to 40                                    | 2.5                              |
| 31                                       | 24 to 32                                    | -0.9                             | 33 to 36                                    | -0.2                             | 37 to 40                                    | 2                                |
| 32                                       | 24 to 32                                    | -1.5                             | 33 to 36                                    | -0.7                             | 37 to 40                                    | 1.5                              |
| 33                                       | 24 to 32                                    | -2                               | 33 to 36                                    | -1.2                             | 37 to 40                                    | 1                                |
| 34                                       | 24 to 32                                    | -2.5                             | 33 to 36                                    | -1.7                             | 37 to 40                                    | 0.4                              |
| 35                                       | 24 to 32                                    | -3                               | 33 to 36                                    | -2.2                             | 37 to 40                                    | -0.1                             |
| 36                                       | 24 to 32                                    | -3.6                             | 33 to 36                                    | -2.8                             | 37 to 40                                    | -0.6                             |
| 37                                       | 24 to 32                                    | -4.1                             | 33 to 36                                    | -3.3                             | 37 to 40                                    | -1.1                             |
| 38                                       | 24 to 32                                    | -4.6                             | 33 to 36                                    | -3.8                             | 37 to 40                                    | -1.7                             |
| 39                                       | 24 to 32                                    | -5.1                             | 33 to 36                                    | -4.3                             | 37 to 40                                    | -2.2                             |
| 40                                       | 24 to 32                                    | -5.6                             | 33 to 36                                    | -4.9                             | 37 to 40                                    | -2.7                             |

Abbreviations: HD, hemodialysis.

Predictive model for post-dialysis serum bicarbonate concentration accounts for pre-dialysis serum bicarbonate concentration and dialysate bicarbonate prescription.



**Supplementary Table 8.** Predicted post-HD serum calcium concentration.

| Pre-HD calcium concentration (mg/dL) | Dialysate calcium concentration (mEq/L) | Expected Change Pre-Post (mg/dL) | Dialysate calcium concentration (mEq/L) | Expected Change Pre-Post (mg/dL) | Dialysate calcium concentration (mEq/L) | Expected Change Pre-Post (mg/dL) |
|--------------------------------------|-----------------------------------------|----------------------------------|-----------------------------------------|----------------------------------|-----------------------------------------|----------------------------------|
| 7.0-7.5                              | 1.5 and 1.6                             | 1.7                              | 2 and 2.5                               | 1.3                              | 3.0 and 3.5                             | 2.2                              |
| 7.6-8.0                              | 1.5 and 1.6                             | 1.3                              | 2 and 2.5                               | 0.9                              | 3.0 and 3.5                             | 1.8                              |
| 8.1-8.5                              | 1.5 and 1.6                             | 1.1                              | 2 and 2.5                               | 0.7                              | 3.0 and 3.5                             | 1.6                              |
| 8.6-9.0                              | 1.5 and 1.6                             | 0.8                              | 2 and 2.5                               | 0.3                              | 3.0 and 3.5                             | 1.3                              |
| 9.1-9.5                              | 1.5 and 1.6                             | 0.5                              | 2 and 2.5                               | 0.1                              | 3.0 and 3.5                             | 1                                |
| 9.6-10.0                             | 1.5 and 1.6                             | 0.3                              | 2 and 2.5                               | -0.2                             | 3.0 and 3.5                             | 0.7                              |
| 10.1-10.5                            | 1.5 and 1.6                             | 0                                | 2 and 2.5                               | -0.5                             | 3.0 and 3.5                             | 0.4                              |
| 10.6-11.0                            | 1.5 and 1.6                             | -0.1                             | 2 and 2.5                               | -0.5                             | 3.0 and 3.5                             | 0.4                              |
| 11.1-11.5                            | 1.5 and 1.6                             | -0.7                             | 2 and 2.5                               | -1.2                             | 3.0 and 3.5                             | -0.3                             |
| 11.5-12.0                            | 1.5 and 1.6                             | -1.4                             | 2 and 2.5                               | -1.9                             | 3.0 and 3.5                             | -1                               |

Abbreviations: HD, hemodialysis.

Predictive model for post-dialysis serum calcium concentration accounts for pre-dialysis serum calcium concentration and dialysate calcium prescription.

**Supplementary Figure 1.** Predicted change in serum sodium (A, India; B, US), serum potassium (C, India; D, US), serum bicarbonate (E, India; F, US), and serum calcium (G, India; H, US), according to baseline serum electrolyte and dialysate prescription. Each graph is based on a model that adjusted for the pre-HD concentration of the corresponding electrolyte of interest.

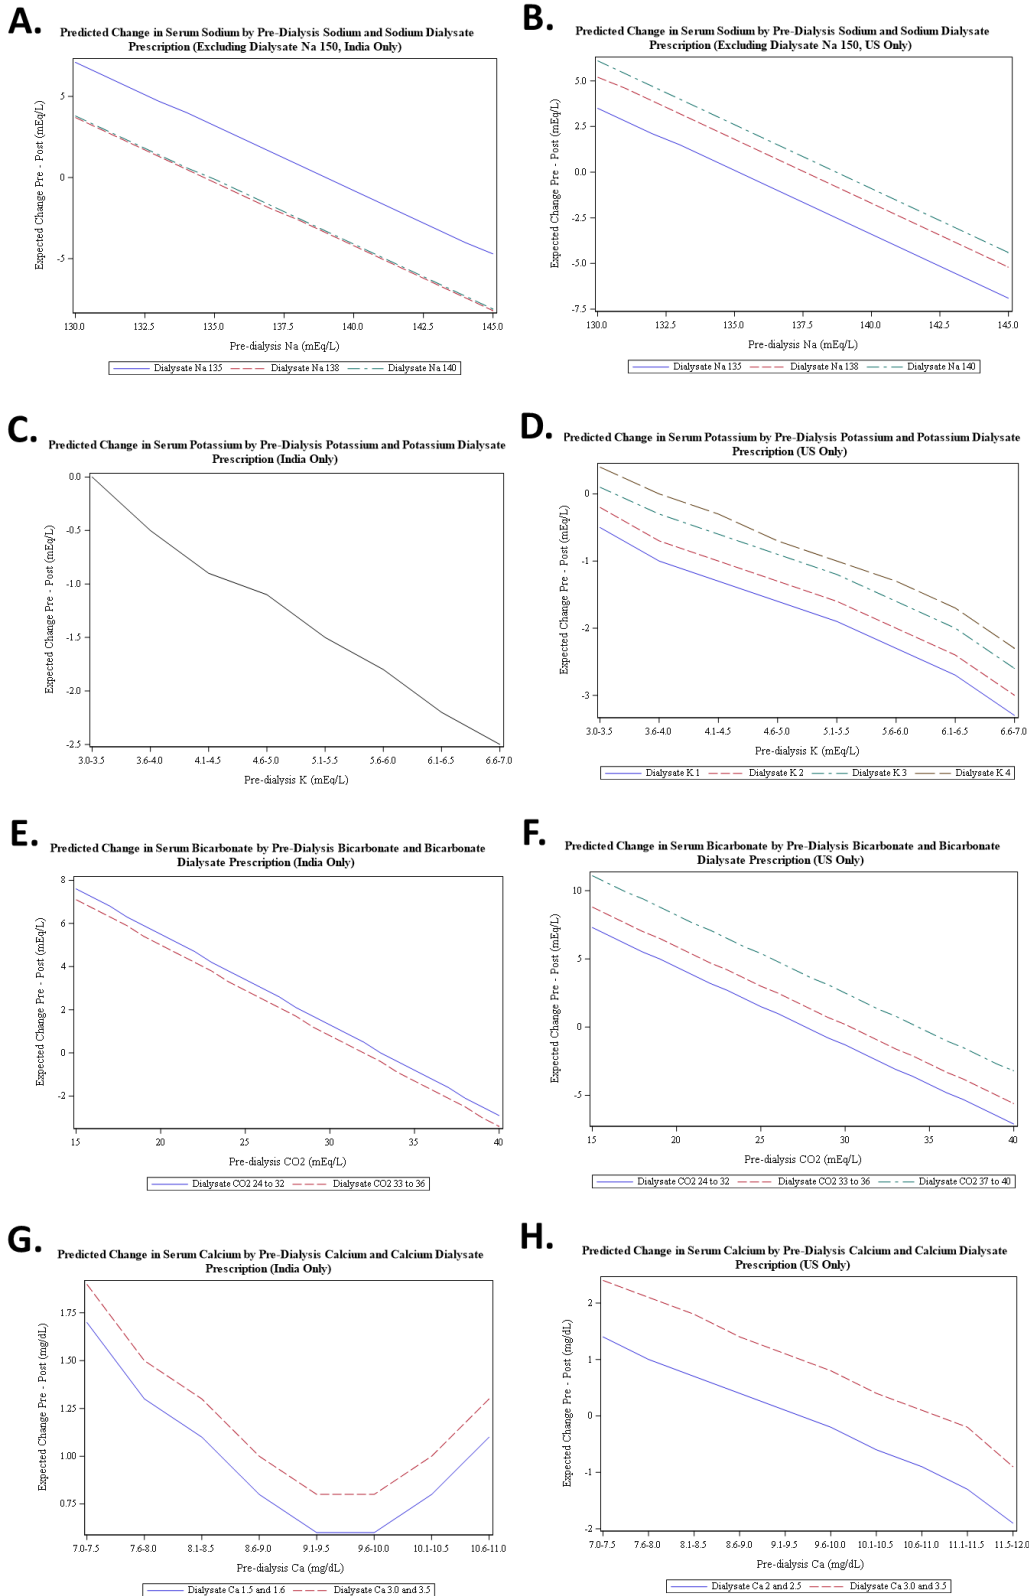

Supplement: 7056_2_supp_68488_qvqq6q.pdf [file 7056_2_supp_68488_qvqq6q.pdf]
